# Supplementary material
Source: MDPI journal article supplement (https://www.mdpi.com/2073-4395/14/5/994)
Supplement: s1 [file s1]

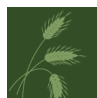

## Supplemental Materials

**Figure S1** The relationship between the values of  $EC_{1:5}$  and soil salt content.

**Figure S2** Soil water content changes with soil depth under film-mulched drip irrigation at dry sowing and wet emergence stages for the humic acid (H), biochar-based microbial agent (M), and vermicompost (V) synergistic effect in 2021.

**Figure S3** Soil water content changes with soil depth under film-mulched drip irrigation at dry sowing and wet emergence stages for the humic acid (H), biochar-based microbial agent (M), and vermicompost (V) synergistic effect in 2022.

**Figure S4** Soil water content changes with soil depth under film-mulched drip irrigation at dry sowing and wet emergence stages for the humic acid (H), biochar-based microbial agent (M), and vermicompost (V) synergistic effect in 2023.

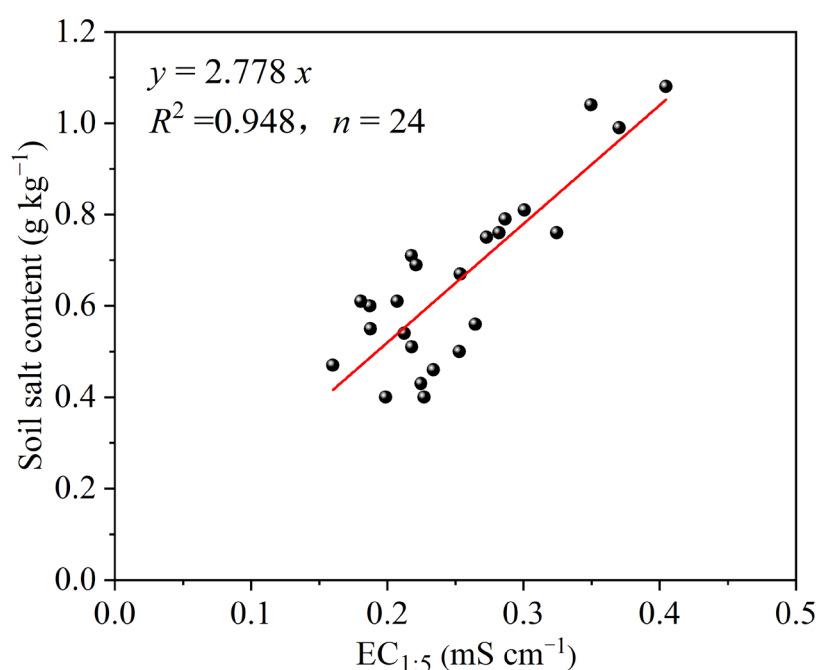

**Figure S1.** The relationship between the values of  $EC_{1:5}$  and soil salt content.

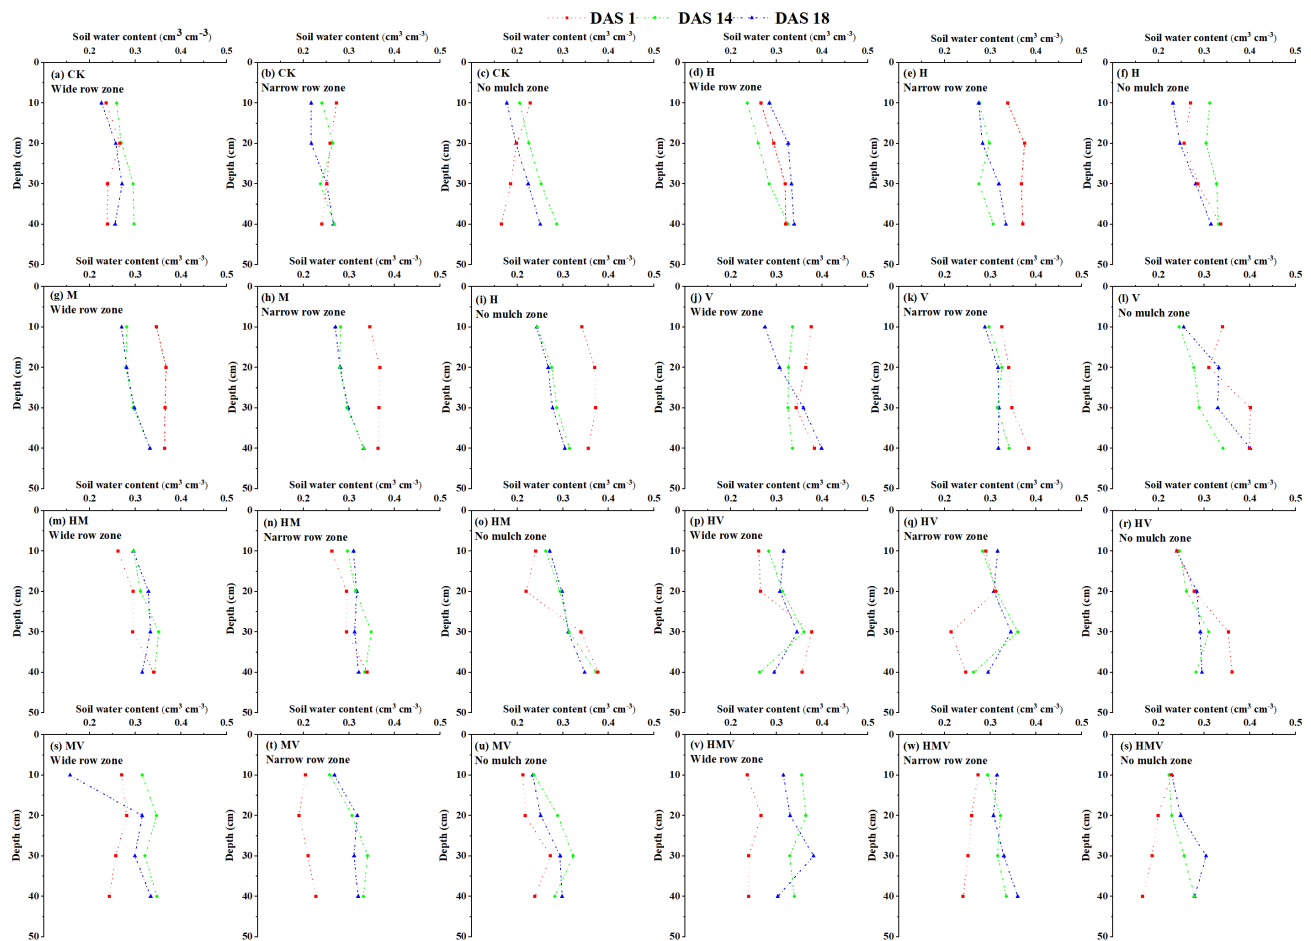

**Figure S2.** Effects of humic acid (H), biochar-based microbial agent (M), and vermicompost (V) treatment on soil water content at 0–40 cm in dry sowing and wet emergence stages under film drip irrigation in 2021.

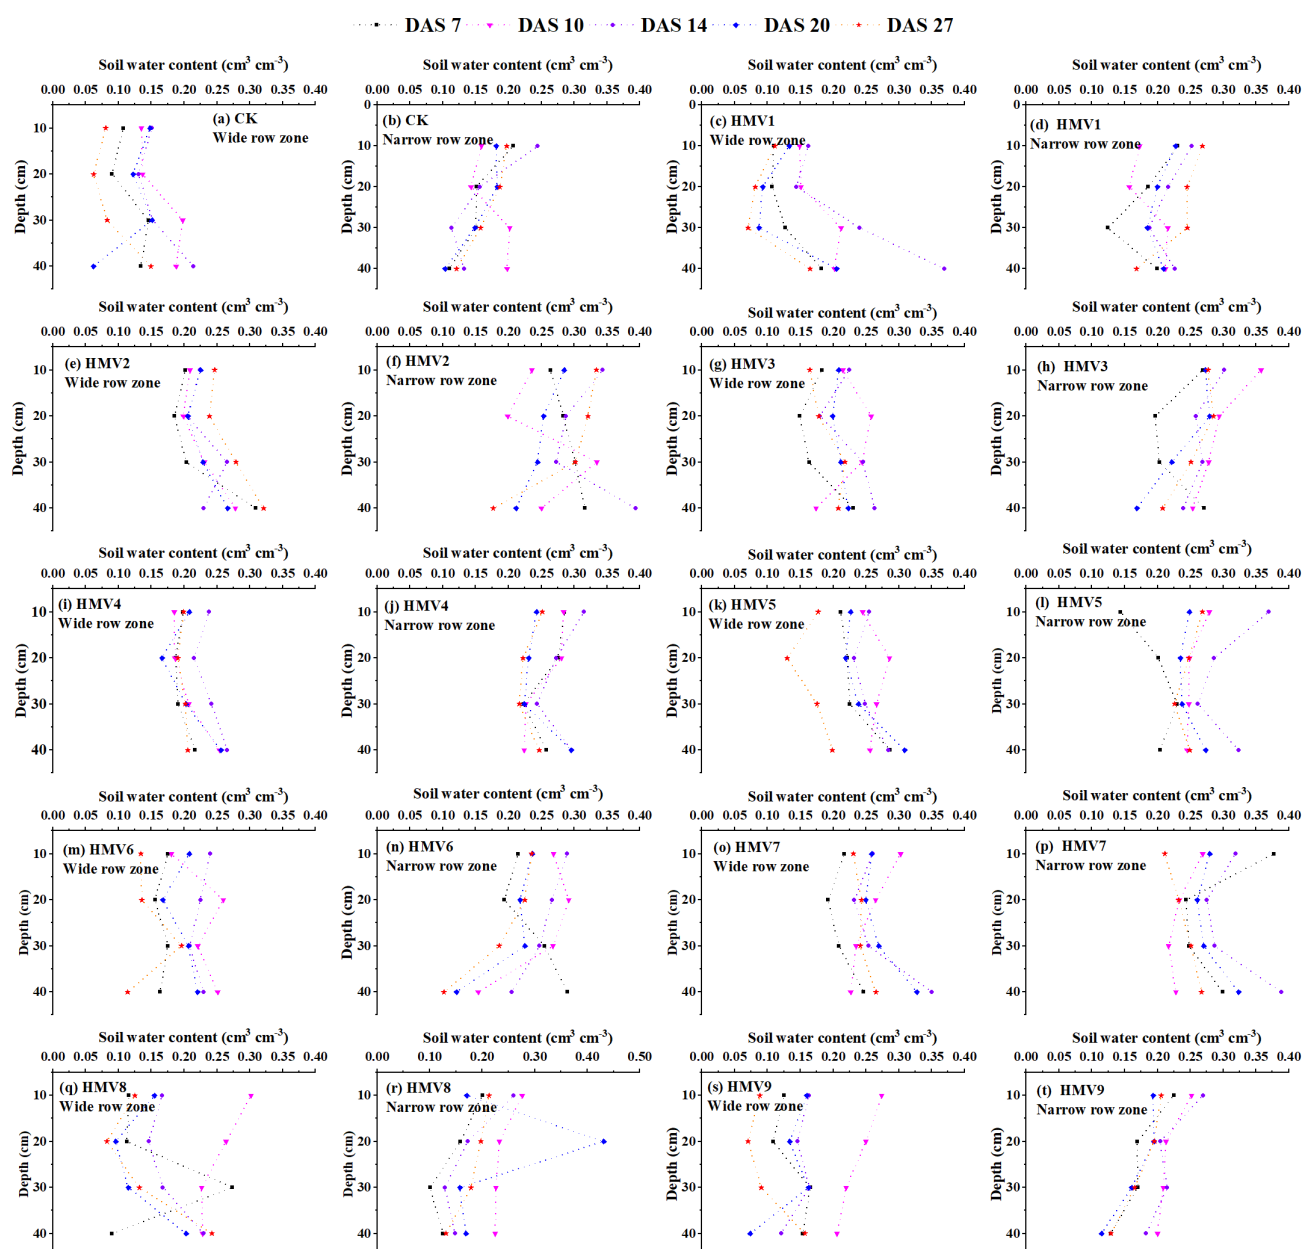

**Figure S3.** The synergistic effect of humic acid (H), biochar-based microbial agent (M), and vermicompost (V) on the 0–40 cm soil water content in the dry sowing and wet emergence stages of drip irrigation under the film in 2022.

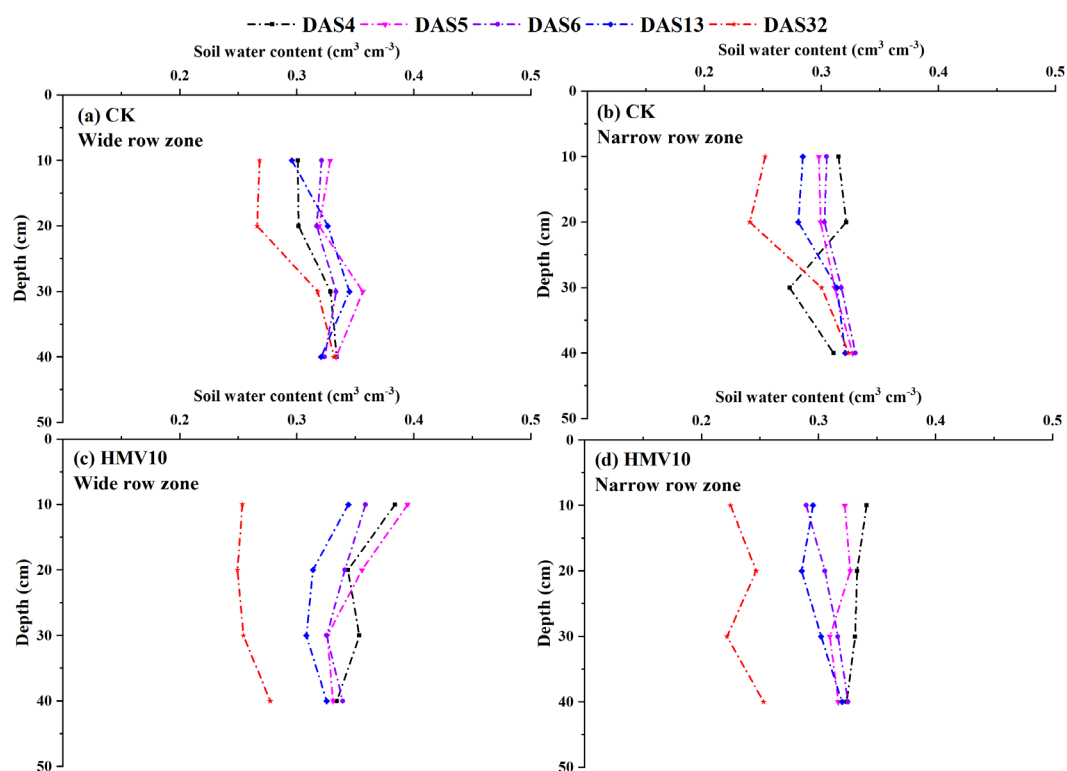

**Figure S4.** The synergistic effect of humic acid (H), biochar-based microbial agent (M), and vermicompost (V) on the 0–40 cm soil water content in the dry sowing and wet emergence stages of drip irrigation under the film in 2023.
